# Supplementary material
Source: PubMed Central journal article supplement (PMC4811678)
Supplement: NIHMS759361-supplement-Supplemental_Material.pdf [file NIHMS759361-supplement-Supplemental_Material.pdf]

**SUPPLEMENT MATERIAL**

**SUPPLEMENTAL TABLES**

**Supplemental Table 1. Frequency of right heart catheterization (RHC) studies by region according to U.S. Census boundaries.**

| <b>Region</b> | <b>RHC Studies (N)</b> | <b>% of Cohort</b> |
|---------------|------------------------|--------------------|
| Midwest       | 5126                   | 23.6               |
| Northeast     | 1971                   | 9.1                |
| South         | 9362                   | 43.1               |
| West          | 5268                   | 24.3               |

**Supplemental Table 2. Validation of hemodynamics.**

| <b>Validation Method</b>                    | <b>N</b> | <b>25<sup>th</sup> Percentile</b> | <b>Median</b> | <b>75% Percentile</b> |
|---------------------------------------------|----------|-----------------------------------|---------------|-----------------------|
| $\Delta$ reported vs. calculated PVR (W.U.) | 21604    | 0.00                              | 0.00          | 0.00                  |
| PASP–RVSP (mmHg)                            | 21349    | -2.00                             | 0.00          | 2.00                  |
| mPAP reported–mPAP calculated (mmHg)        | 21648    | .333                              | 1.67          | 2.67                  |

To assess the fidelity of hemodynamic data, the difference between reported and calculated mPAP and reported and calculated PVR was determined for subjects in the cohort. Additionally, the difference between pulmonary artery systolic pressure (PASP) and right ventricular systolic pressure (RVSP) was calculated and is summarized. mPAP, mean pulmonary artery pressure in mmHg; PVR, pulmonary vascular resistance in Wood units (W.U.).

## SUPPLEMENTAL FIGURE LEGENDS

**Supplemental Figure 1. Distribution of mean pulmonary artery pressure (mPAP) assessed by right heart catheterization for the study cohort.** A histogram demonstrating the distribution of mPAP pressure among the cohort of 21,717 subjects from the VA CART database analyzed in this study. Bin width is 5 mmHg.

**Supplemental Figure 2. The effect of a 1-mmHg unit increase in mean pulmonary artery pressure (mPAP) on hazard of mortality.** At a particular mPAP level between 11-60 mmHg, this figure shows the relative change in hazard ratios associated with a 1-unit increase in mPAP (with 95% CI), and is calculated from the spline fit of mPAP in the adjusted model. An increase in relative change in hazard is observed beginning at approximately 15 mmHg, peaking in the range of approximately 19-24 mmHg, and decreases (but remains positive) at mPAP levels indicative of moderate or severe pulmonary hypertension.

**Supplemental Figure 3. Forest plot of adjusted mortality hazard ratio stratified by mean pulmonary artery pressure (mPAP) increment.** The hazard ratio for mortality is presented for the study cohort stratified by mPAP sextile. Data are expressed as the hazard ratio (95% CI) relative to the lowest sextile (mPAP 5-18 mmHg) for all-cause mortality.

**Supplemental Figure 4. Time-to-event plots for unadjusted all-cause mortality among patients from the study cohort stratified by mean pulmonary artery pressure**

**(mPAP) sextile.** Survival curves based on a Kaplan–Meier analysis of the unadjusted probability of survival stratified by mPAP sextile are shown. Censoring begins at approximately one year post-procedure and is indicated by the thick portion on the curves.

**Supplemental Figure 5. Time-to-event plots for unadjusted hospitalization-free survival among patients from the study cohort stratified by mean pulmonary artery pressure (mPAP) sextile.** Survival curves based on a Kaplan–Meier analysis of the unadjusted probability of hospitalization-free survival stratified by mPAP sextile are shown. Censoring begins at approximately one year post-procedure and is indicated by the thick portion on the curves.

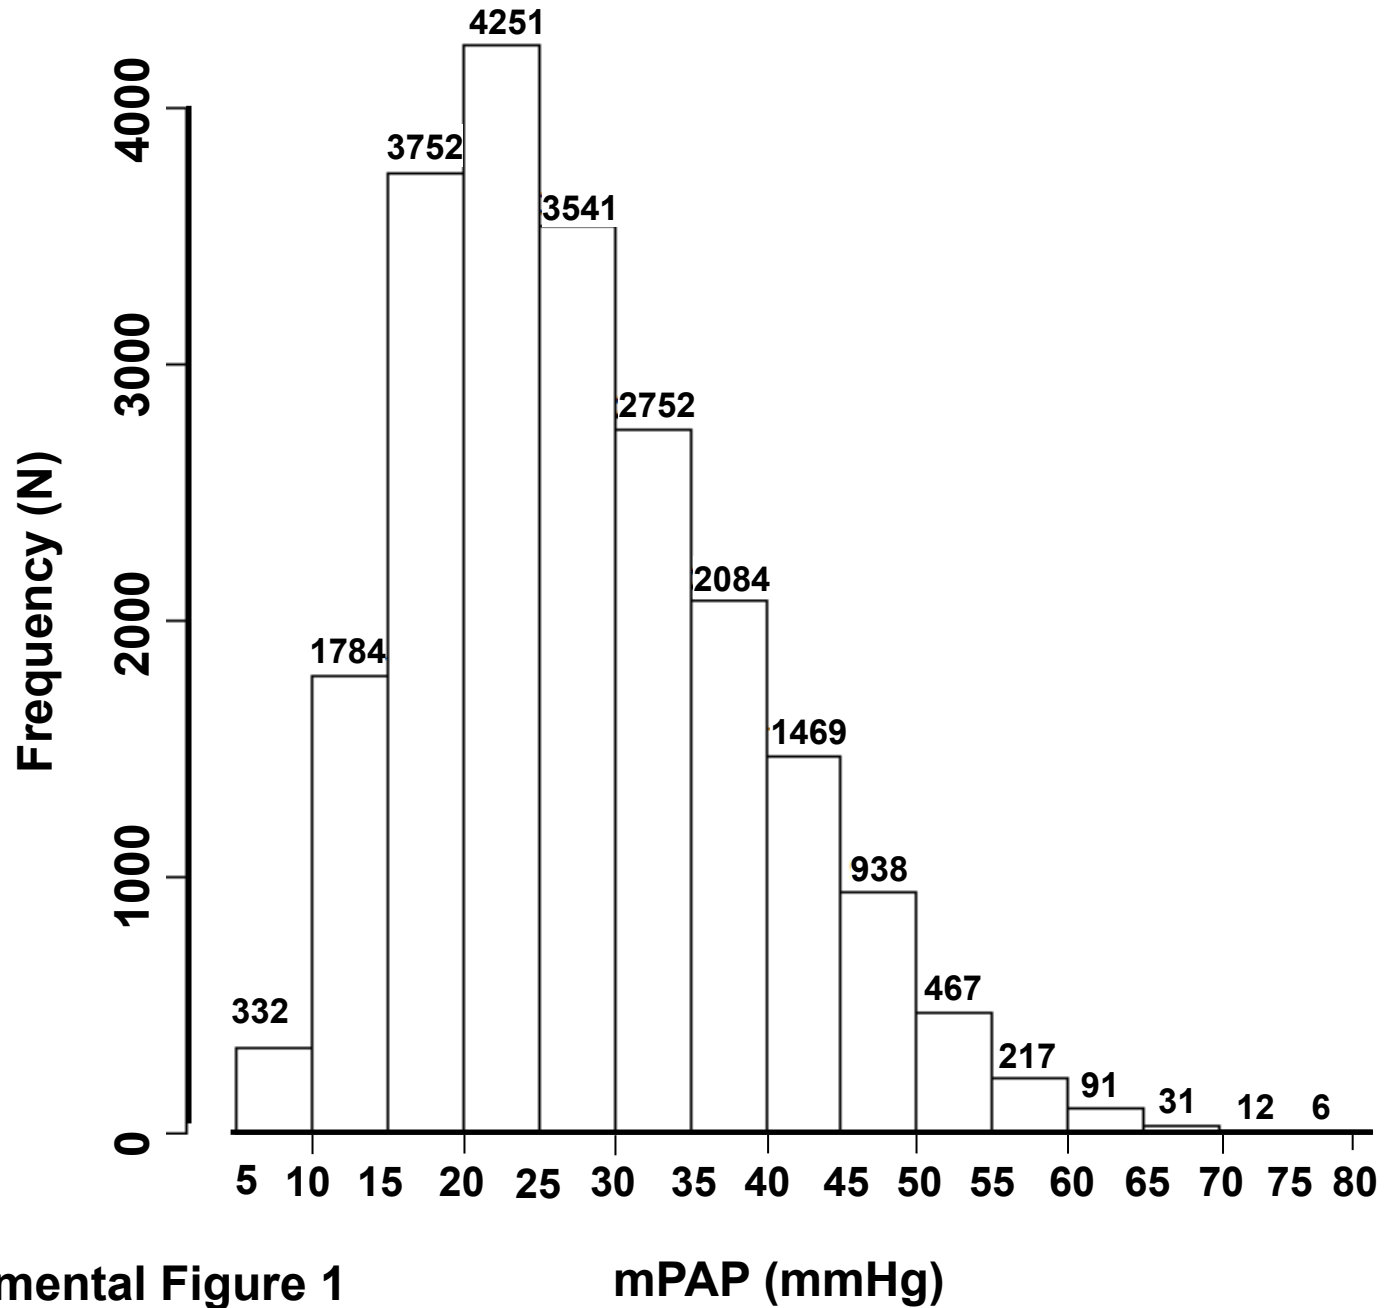

Supplemental Figure 1

mPAP (mmHg)

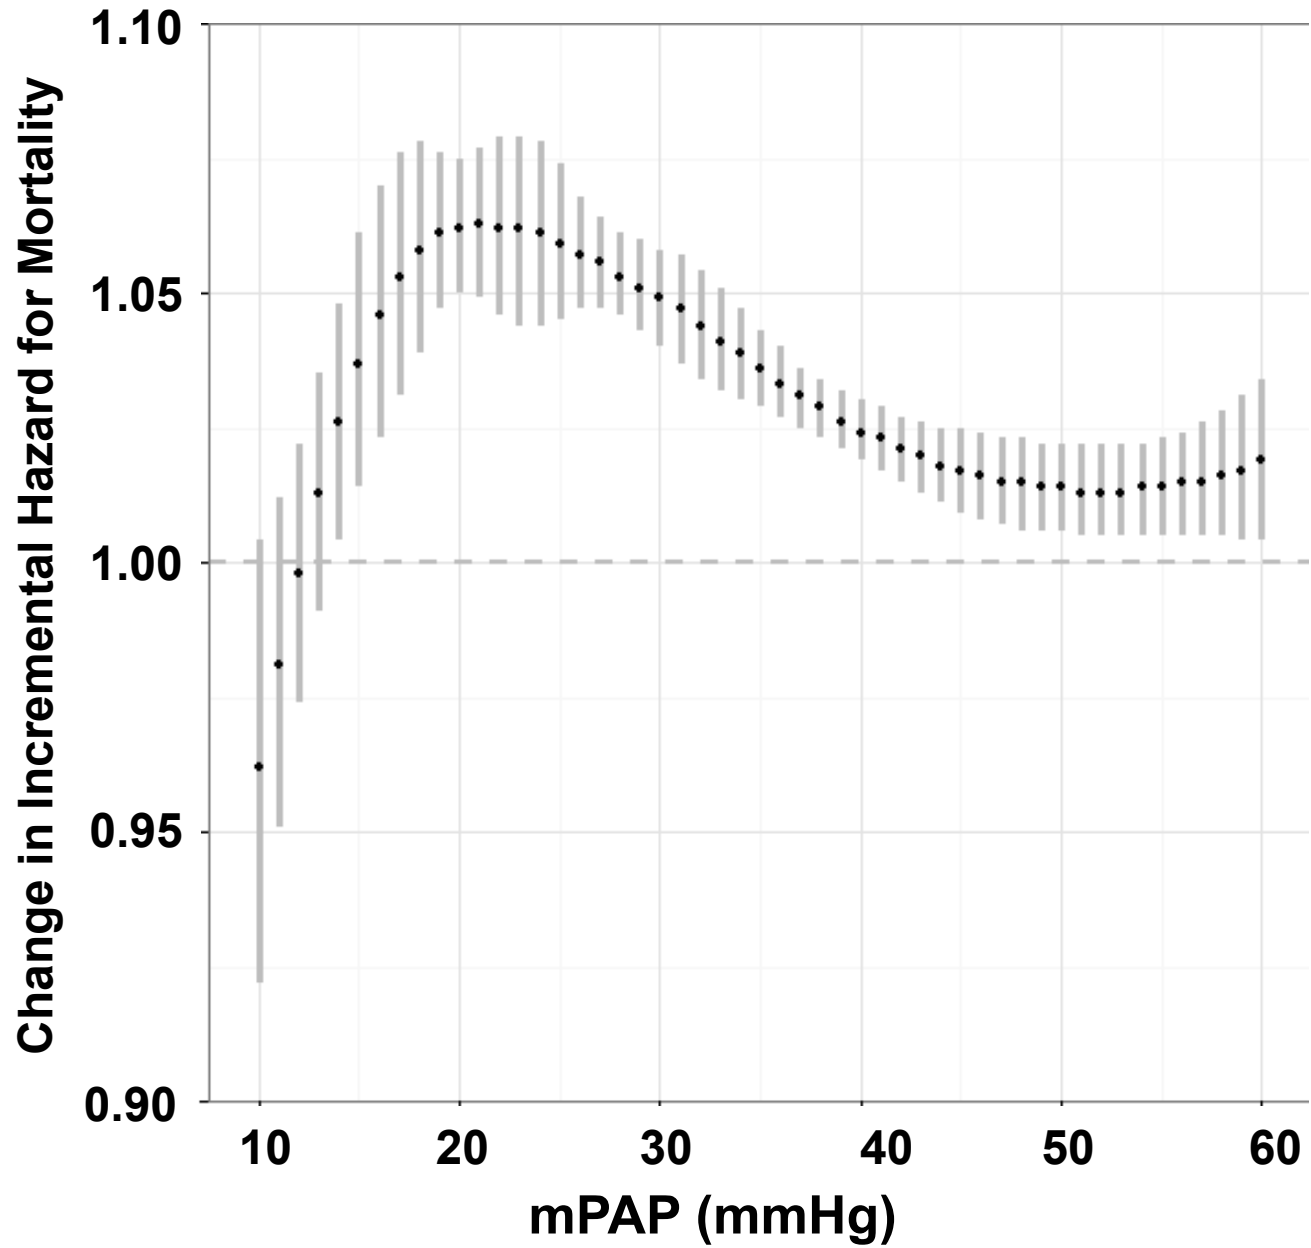

Supplemental Figure 2

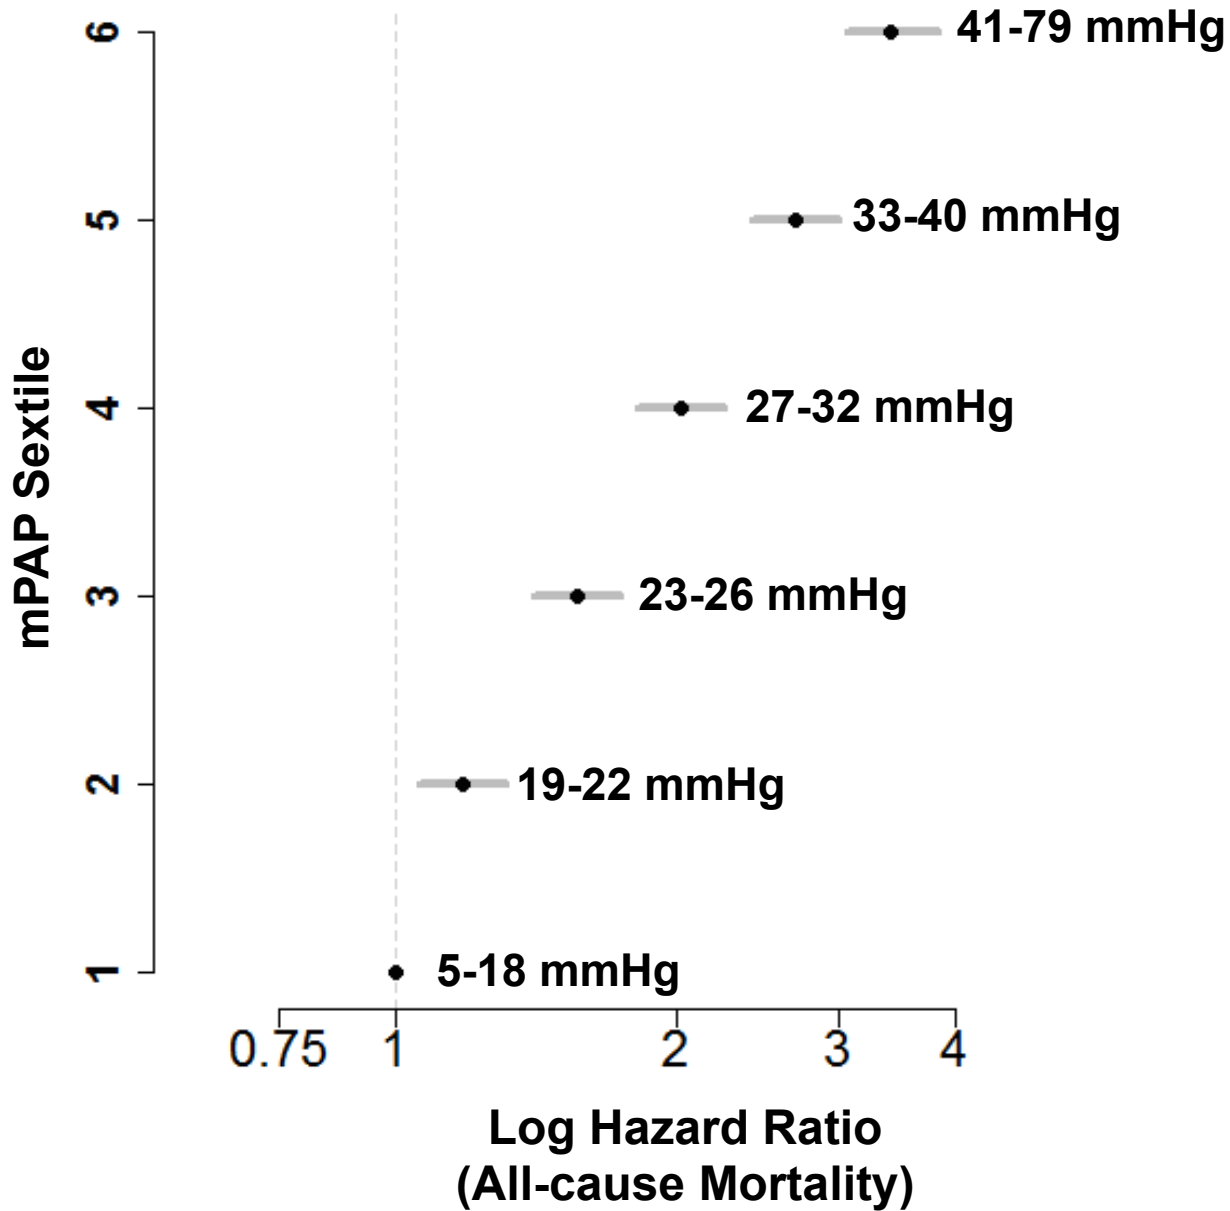

Supplemental Figure 3

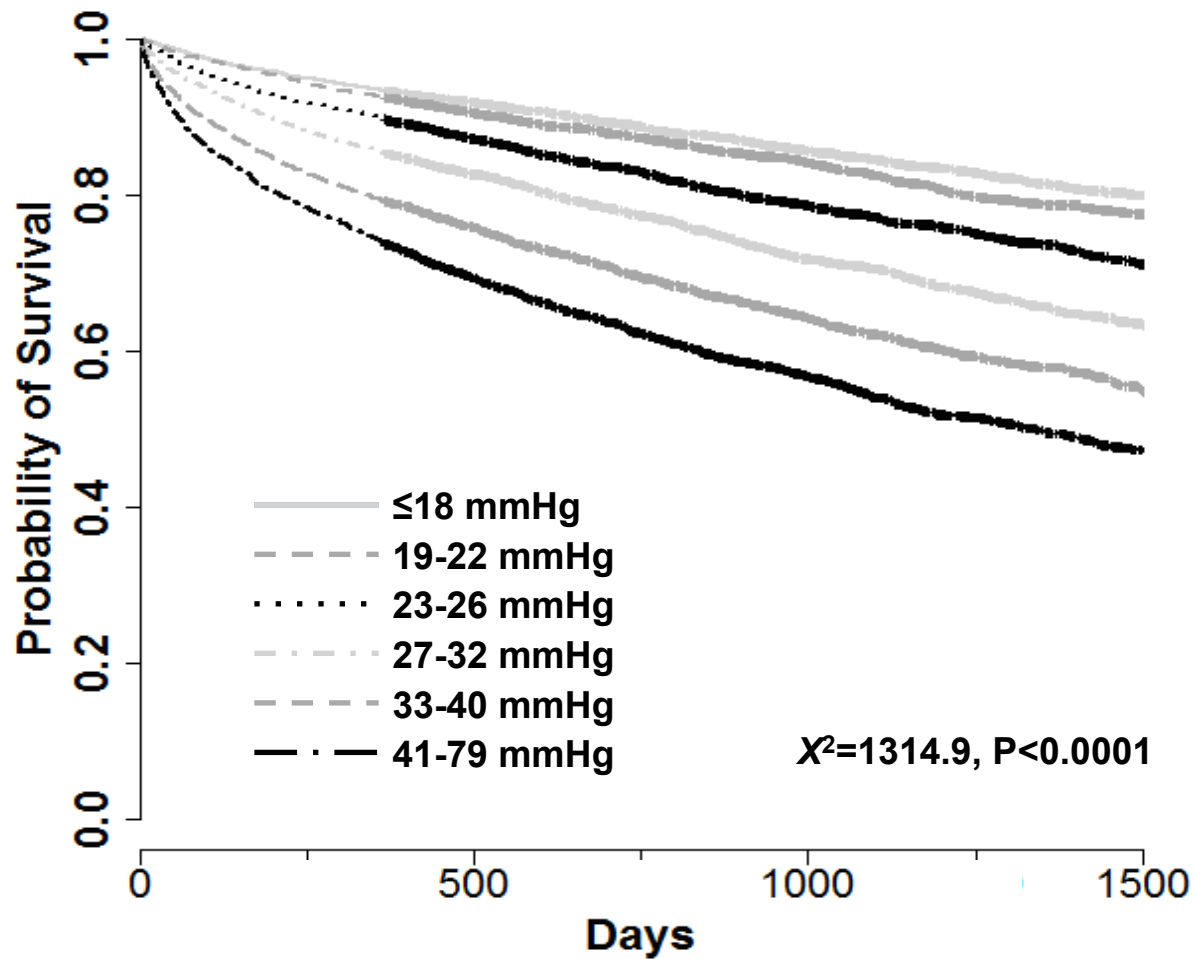

| <u>No. at risk</u> |      |      |      |      |
|--------------------|------|------|------|------|
| ≤18 mmHg           | 4207 | 3545 | 2189 | 1001 |
| 19-22 mmHg         | 3374 | 2800 | 1717 | 812  |
| 23-27 mmHg         | 3292 | 2643 | 1565 | 717  |
| 28-32 mmHg         | 3974 | 3015 | 1710 | 765  |
| 33-40 mmHg         | 3649 | 2536 | 1413 | 633  |
| 41-90 mmHg         | 3231 | 2042 | 1080 | 476  |

**Supplemental Figure 4**



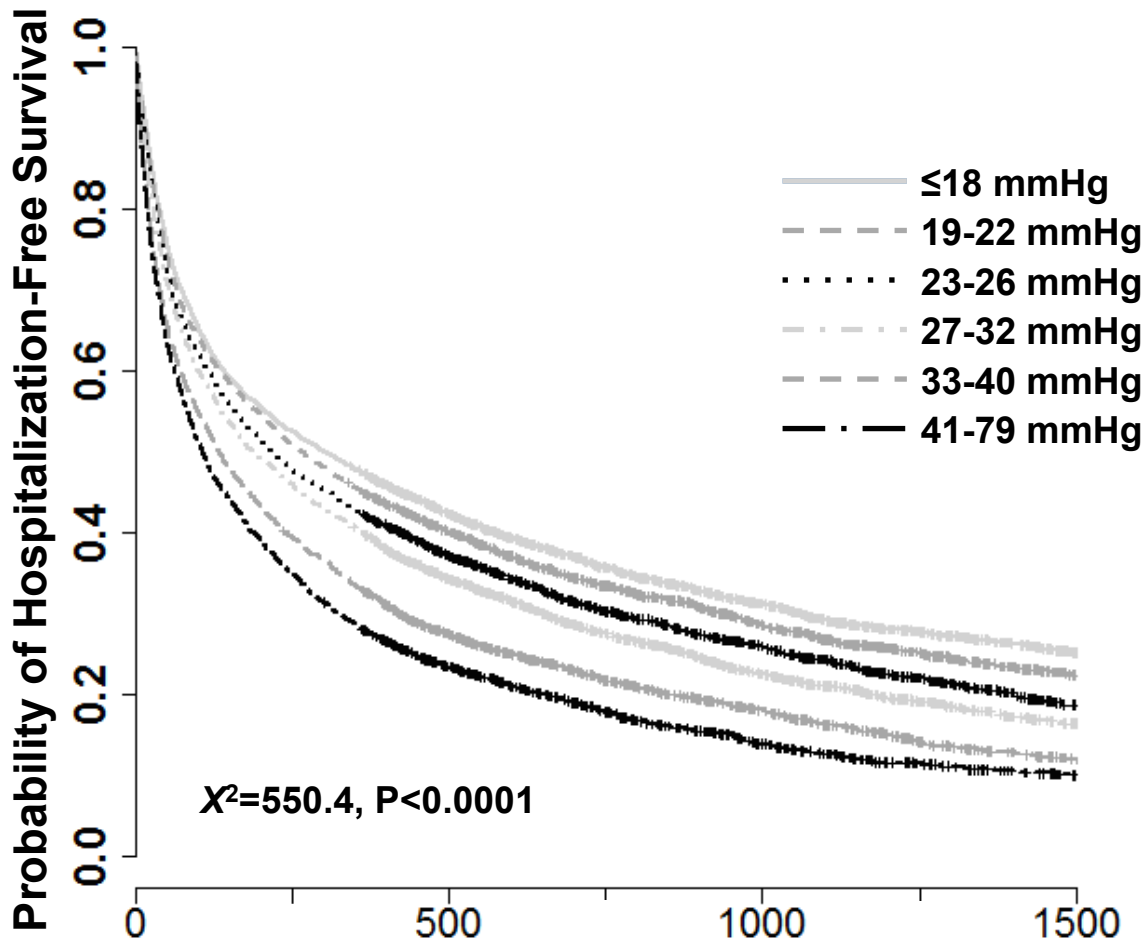

**No. at risk**

|                   | <b>Days</b> |             |            |            |
|-------------------|-------------|-------------|------------|------------|
|                   | 0           | 500         | 1000       | 1500       |
| <b>≤18 mmHg</b>   | <b>4207</b> | <b>1619</b> | <b>777</b> | <b>297</b> |
| <b>19-22 mmHg</b> | <b>3374</b> | <b>1238</b> | <b>594</b> | <b>229</b> |
| <b>23-27 mmHg</b> | <b>3292</b> | <b>1129</b> | <b>519</b> | <b>179</b> |
| <b>28-32 mmHg</b> | <b>3974</b> | <b>1238</b> | <b>510</b> | <b>182</b> |
| <b>33-40 mmHg</b> | <b>3649</b> | <b>918</b>  | <b>406</b> | <b>141</b> |
| <b>41-90 mmHg</b> | <b>3231</b> | <b>683</b>  | <b>260</b> | <b>98</b>  |

**Supplemental Figure 5**
